# Supplementary material
Source: PubMed Central journal article supplement (PMC2475696)
Supplement: supp_M706494200_Supplemental.pdf [file supp_M706494200_Supplemental.pdf]

## SUPPLEMENTAL DATA

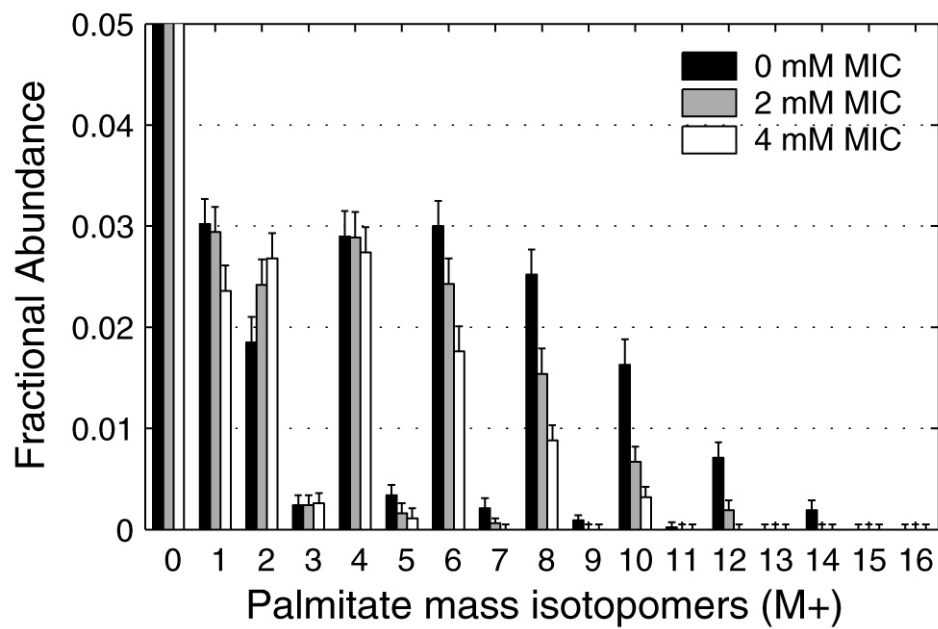

**Figure S1.** Effect of 2-methylisocitrate (MIC) on palmitate synthesis from [U-<sup>13</sup>C]glutamine. Shown is the mass isotopomer distribution of palmitate from WT brown adipocytes on day 4, after 6-hr incubation in media containing 4 mM [U-<sup>13</sup>C]glutamine and 0, 2, or 4 mM 2-methylisocitrate (mean ± SEM; n=3). Data were corrected for natural isotope enrichments.

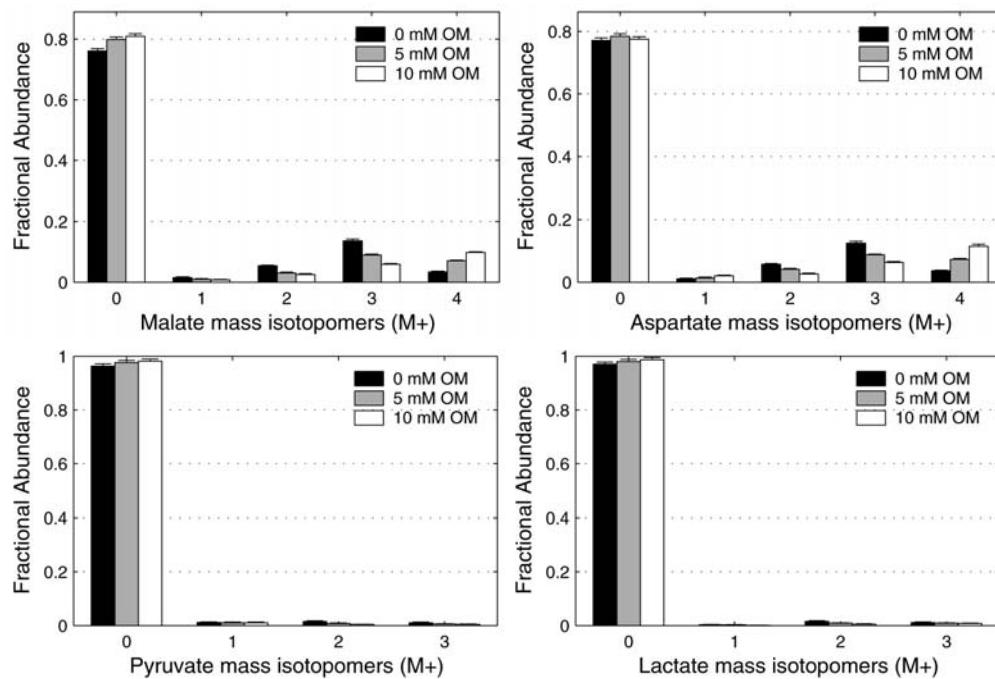

**Figure S2.** Effect of increasing concentration of oxalomalate on labeling patterns of intracellular metabolites. Shown are mass isotopomer distributions of malate, aspartate, pyruvate and lactate on day 4, after 6-hr incubation in media containing 4 mM [U-<sup>13</sup>C]glutamine and 0, 5, or 10 mM oxalomalate. Data were corrected for natural isotope enrichments.

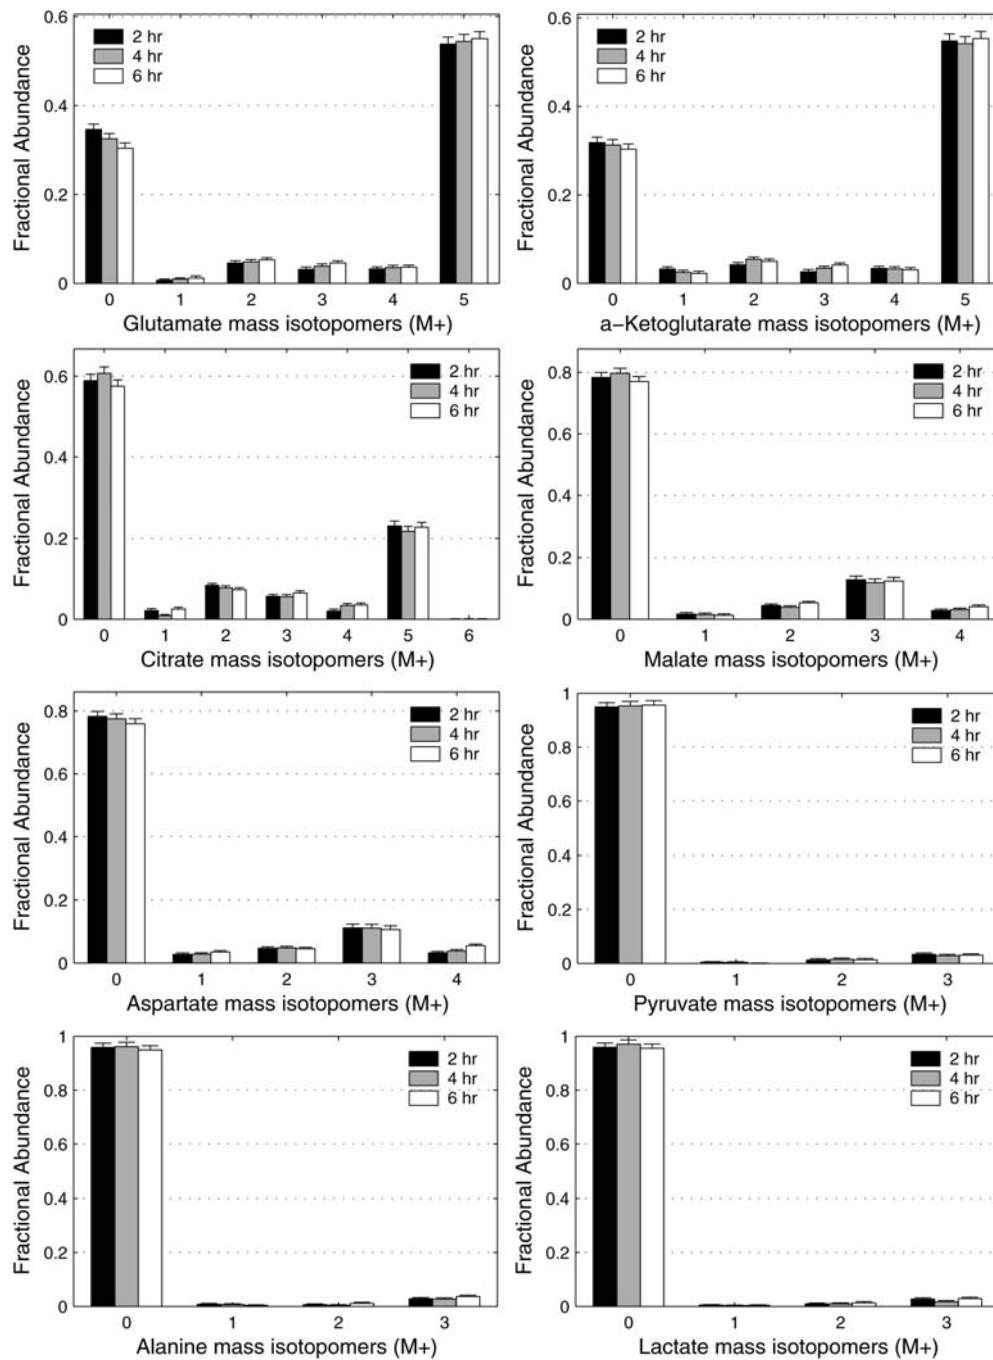

**Figure S3.** Confirmation of isotopic steady-state assumption by time-course <sup>13</sup>C-labeling experiment. Shown are the mass isotopomer distributions of intracellular metabolites from WT brown adipocytes measured at 2, 4, and 6 hrs after incubation with 4 mM [U-<sup>13</sup>C]glutamine on day 4. Data were corrected for natural isotope enrichments.

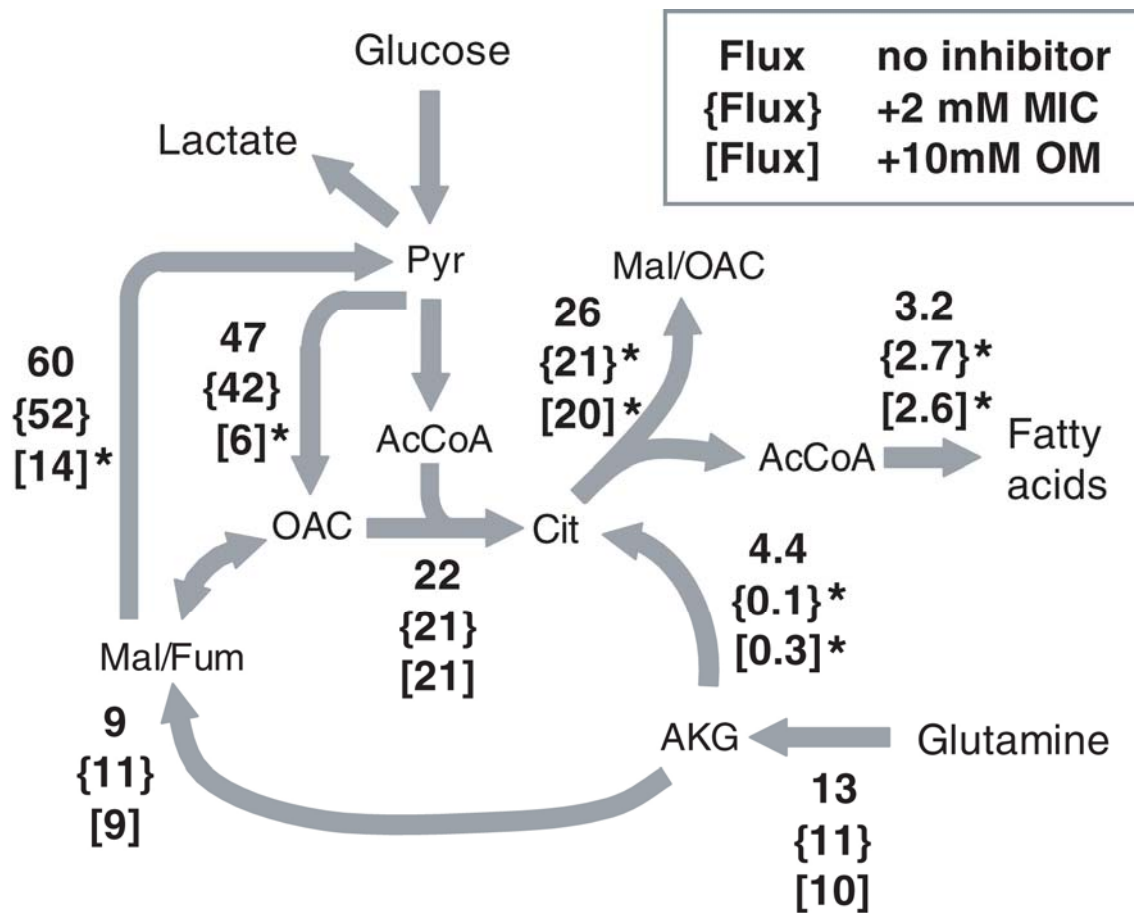

**Figure S4.** Effect of oxalomalate and 2-methylisocitrate on the flux phenotype in WT brown adipocytes. Fluxes ( $\mu\text{mol/g-protein/hr}$ ) were determined with the software Metran by minimizing the difference between measured and predicted mass isotopomers. Shown are fluxes for three representative conditions: the control condition with no inhibitor, 2 mM 2-methylisocitrate (MIC), and 10 mM oxalomalate (OM). Abbreviations: Pyr, pyruvate; Mal, malate; Fum, fumarate; OAC, oxaloacetate; AcCoA, acetyl-CoA; Cit, citrate; AKG, alpha-ketoglutarate. Asterisk (\*) indicates a significant flux difference compared to the control condition ( $P < 0.01$ ). Fluxes are represented by first and last metabolite of nonbranching pathways; thus, some details of the fluxes (e.g., glutamate as an intermediate in glutamine to AKG flux) have been omitted for clarity.
